# Supplementary material
Source: publisher figshare collection journal article supplement (https://acs.figshare.com/ndownloader/files/5984970)
Supplement: Supplementary file 1 [file 5984970]

# SUPPORTING INFORMATION for

## Fano Interference of Electromagnetic Modes in Subwavelength

### Dielectric Nanocrosses

Zhong-Jian Yang

Hunan Key Laboratory of Super Microstructure and Ultrafast Process, School of  
Physics and Electronics, Central South University, Changsha, Hunan 410083, P.R.

China

#### 1. Calculations for individual $NB_1$ and $NB_2$ with mutipole decomposition approach.

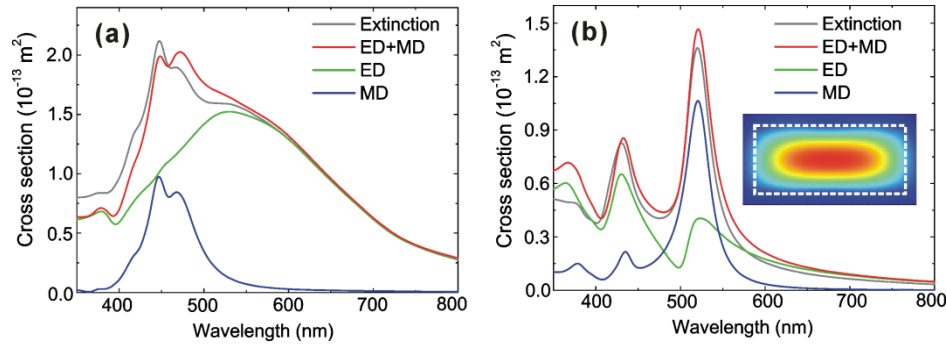

**Figure S1.** The cases for individual  $NB_1$  and  $NB_2$  are shown in (a) and (b), respectively. Here, each of the  $NB_1$  and  $NB_2$  is the same as that in Figure 1 in main text. In each of the figures (a) and (b), the electric dipole and magnetic dipole contributions are shown by green and blue lines, respectively. The red and gray lines show the total extinction cross section from the sum of the multipoles mentioned above and the FDTD simulation, respectively. The inset in (b) shows the magnetic field enhancement distribution near the magnetic dipole position  $\lambda = 520 \text{ nm}$  (the dashed white line shows the  $NB_2$  structure cross section).

## 2. Electric and magnetic near field vector distributions near the Fano dip.

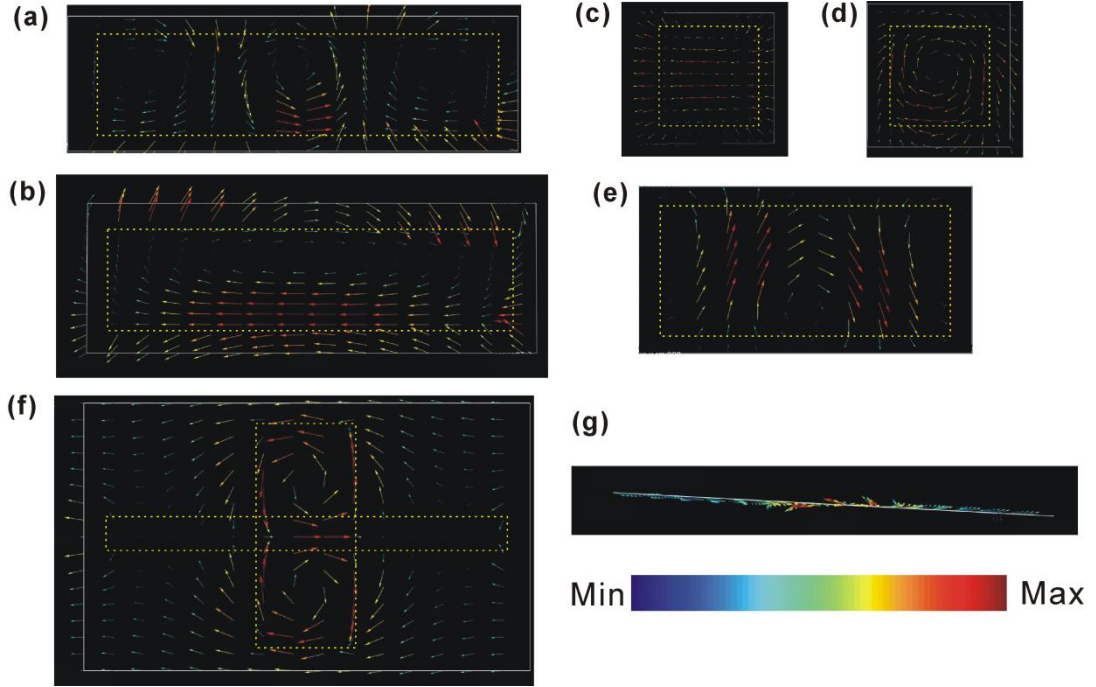

**Figure S2.** The electric field vector distribution on the  $y = 0$  plane at  $\lambda = 505$  nm for the nanocross, individual  $NB_1$  and  $NB_2$  are shown in (a), (b) and (c), respectively. (d) The same plot for the individual  $NB_2$  but the excitation configuration now is the same as that in Figure 1c in main text. (e) The magnetic field vector distribution of the nanocross on the  $x = 0$  plane with  $\lambda = 505$  nm. The magnetic field vector distribution of the nanocross at  $\lambda = 505$  nm on the  $z = 0$  plane with top and side views are shown in (f) and (g), respectively. In each figure, the color of the arrow denotes the magnitude of the field vector, where the blue and red means minimum and maximum value, respectively (the color bar is shown by the inset). The color bars for field vector distributions for other cases discussed below have the same meaning, which will not be specified there. The dashed yellow lines show structure cross sections.

### 3. Electric and magnetic near field vector distributions for constructive field couplings.

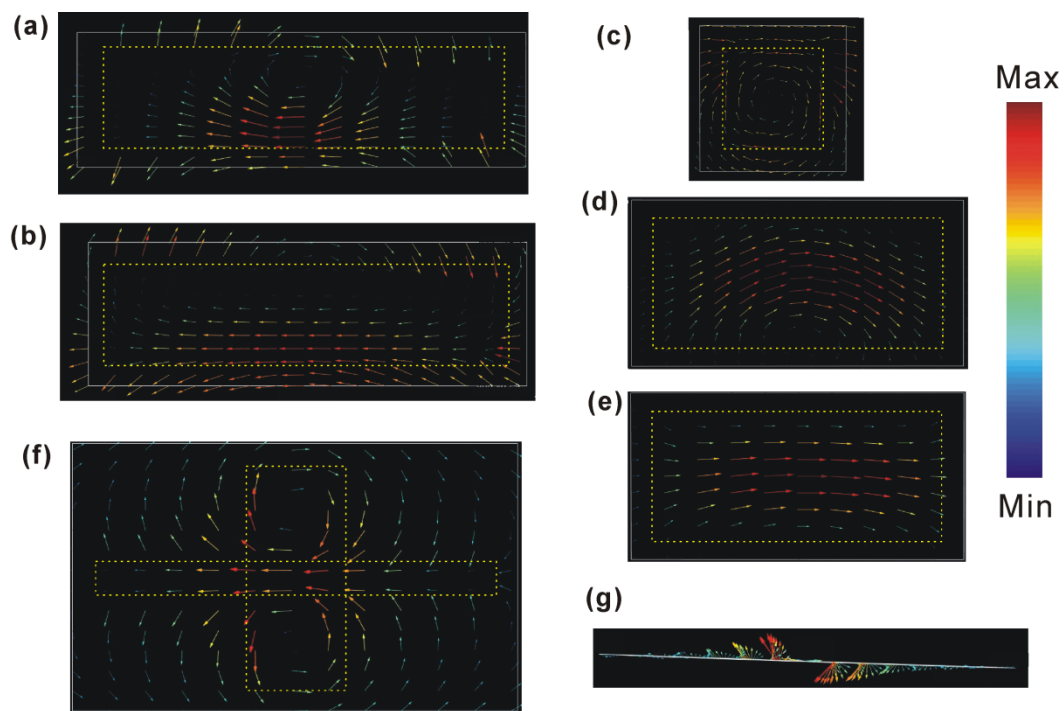

**Figure S3.** The electric field vector distributions on the  $y = 0$  plane at  $\lambda = 555\text{nm}$  for the nanocross, individual  $\text{NB}_1$  and  $\text{NB}_2$  are shown in (a), (b) and (c), respectively. The magnetic field vector distributions on  $x = 0$  plane at  $\lambda = 555\text{nm}$  for the nanocross and individual  $\text{NB}_2$  are shown in (d) and (e), respectively. The magnetic field vector distribution for the nanocross at  $\lambda = 555\text{ nm}$  on the  $z = 0$  plane with top and side views are shown in (f) and (g), respectively. The dashed yellow lines show structure cross sections.

**4. Fano resonance spectra for separated  $NB_1$  and  $NB_2$  with  $d = 10$  nm and near field distributions around the Fano dip.**

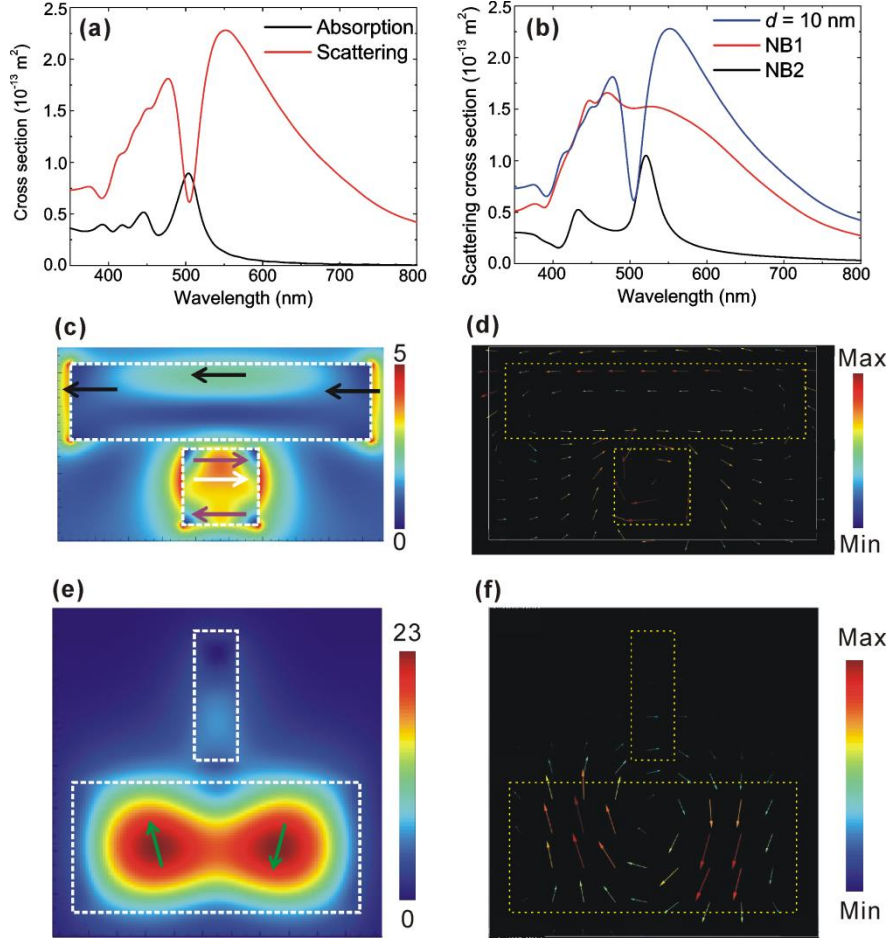

**Figure S4.** (a) The scattering and absorption cross section spectra of the structure with  $d = 10$  nm. (b) Scattering spectra for the coupled structure and individual  $NB_1$  and  $NB_2$  with the same source excitation configuration. (c) The electric field  $|\mathbf{E}|$  distribution on the  $y = 0$  plane at  $\lambda = 505$  nm. The arrows show the electric field directions. (d) The electric field vector distribution on the  $y = 0$  plane at  $\lambda = 505$  nm. (e) The magnetic field  $|\mathbf{H}|$  distribution on the  $x = 0$  plane with  $\lambda = 505$  nm, the arrows show the magnetic field directions. (f) The magnetic field vector distribution on the  $x = 0$  plane with  $\lambda = 505$  nm. The dashed yellow and white lines in (c)-(f) show structure cross sections.

5. Electric and magnetic near field distributions with constructive couplings for separated  $NB_1$  and  $NB_2$  structure with  $d = 10$  nm.

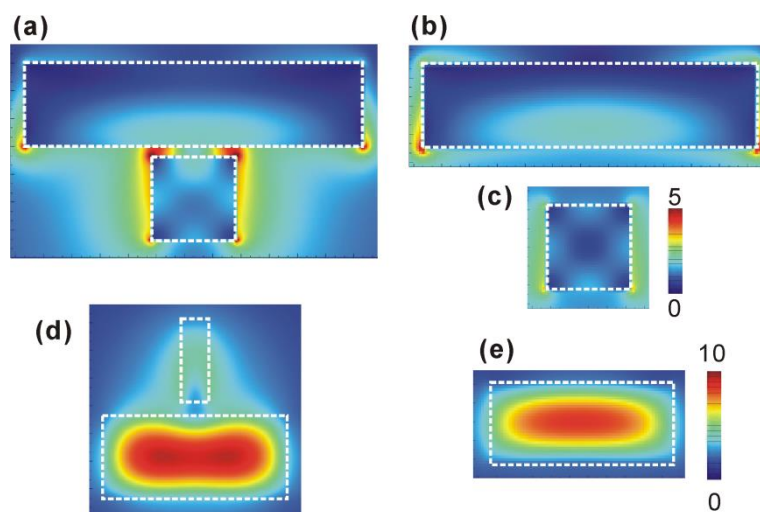

**Figure S5.** The electric field  $|E|$  distribution on the  $y = 0$  plane at  $\lambda = 555$ nm for the coupled structure, individual  $NB_1$  and  $NB_2$  are shown in (a), (b) and (c), respectively. The magnetic field  $|H|$  distribution on  $x = 0$  plane at  $\lambda = 555$ nm for the coupled structure and individual  $NB_2$  are shown in (d) and (e), respectively.

6. The scattering spectra for individual  $NB_2$  with different geometry parameters.

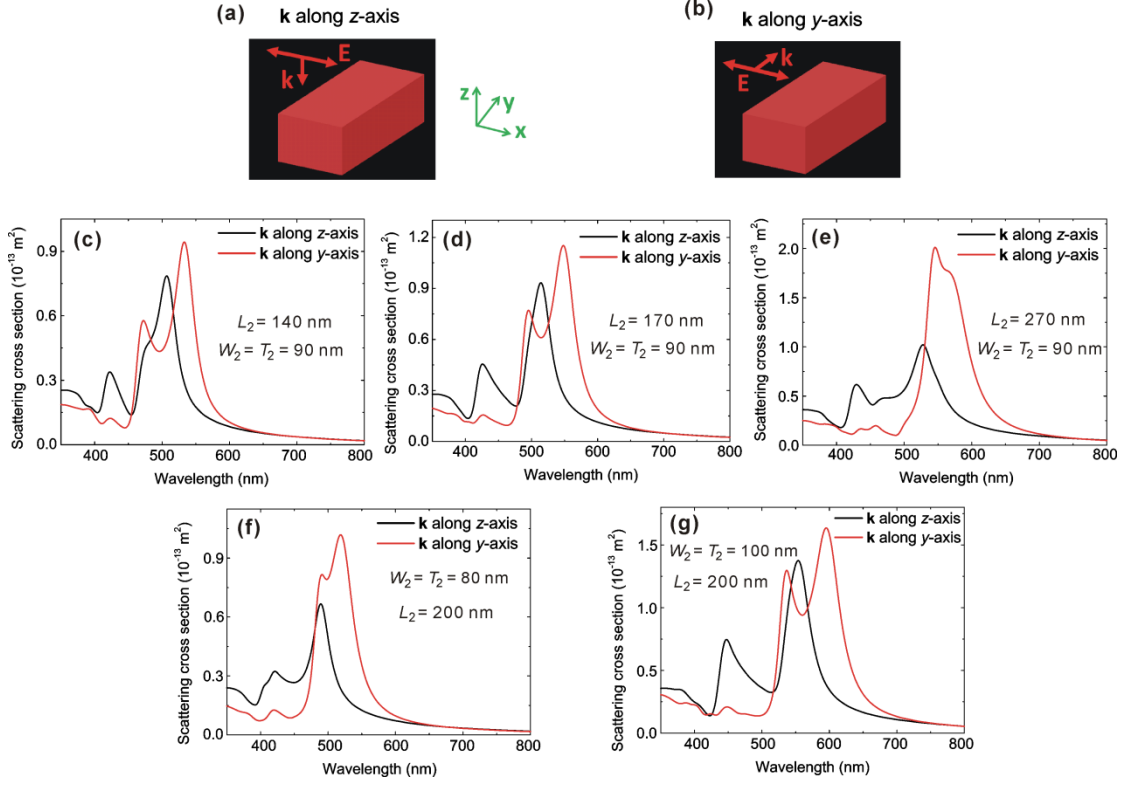

**Figure S6.** The schematics of an individual  $\text{NB}_2$  excited by a plane wave with wave vector  $\mathbf{k}$  along  $z$ -axis and  $y$ -axis are shown in (a) and (b), respectively. The scattering spectra with the two excitations for individual  $\text{NB}_2$  with  $L_2 = 140, 170$  and  $270$  nm are shown in (c), (d) and (e), respectively. Here, the width and thickness are both fixed at  $90$  nm ( $W_2 = T_2 = 90$  nm). The scattering spectra with the two excitations for individual  $\text{NB}_2$  with  $W_2 = T_2 = 80$  and  $100$  nm are shown in (f) and (g), respectively. Here, the length is fixed at  $L_2 = 200$  nm.

## 7. The scattering spectra for nanocross with $L_1 = 550$ nm and individual $\text{NB}_1$ with different geometry parameters.

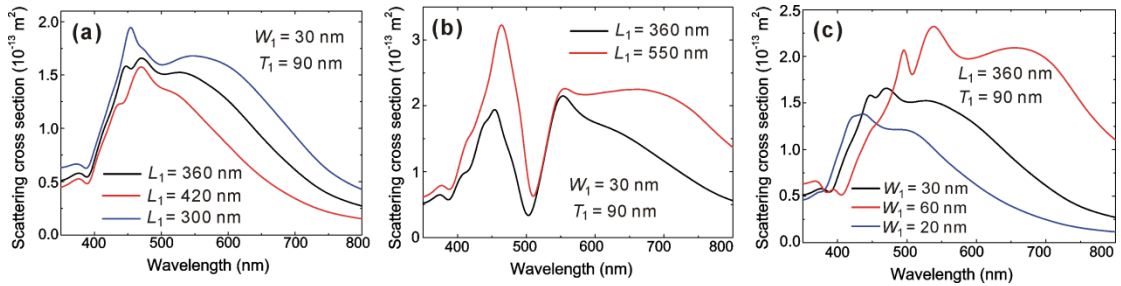

**Figure S7.** (a) The scattering spectra for individual  $\text{NB}_1$  with length  $L_1 = 360, 420$  and

300 nm. The width and thickness are fixed at 30 and 90 nm, respectively. (b) The scattering spectra for the nanocrosses with length  $L_1 = 360$  and 550 nm. The width and thickness are fixed at 30 and 90 nm, respectively. (c) The scattering spectra for individual  $NB_1$  with width  $W_1 = 30, 60$  and 20 nm. The length and thickness are fixed at 360 and 90 nm, respectively.

## 8. The scattering spectra for nanocross on substrates.

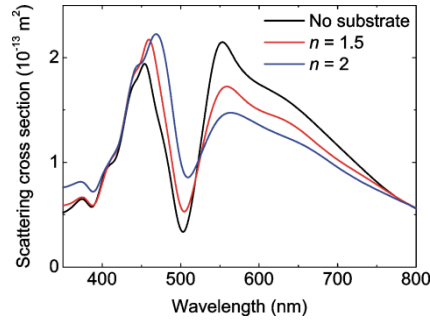

**Figure S8.** The scattering spectra for nanocross placed on substrate with  $n = 1.5$  and 2. The case for nanocross without substrate is also shown for comparison. The nanocross is the same as that in Figure 2 in main text.
